# Supplementary material
Source: publisher figshare collection journal article supplement (https://acs.figshare.com/ndownloader/files/4697884)
Supplement: Supplementary file 1 [file 4697884]

# Raspberry-like silica hollow spheres: hierarchical structures by dual latex-surfactant templating route

Xiaofeng Wu<sup>†,‡,\*</sup>, Yajun Tian<sup>†</sup>, Yanbin Cui<sup>†,‡</sup>, Lianqi Wei<sup>†,‡</sup>, Qi Wang<sup>†,‡</sup>, Yunfa Chen<sup>†</sup>

<sup>†</sup> Institute of Process Engineering of Chinese Academy of Sciences, Beijing, 100080, China.

<sup>‡</sup> Graduate University of Chinese Academy of Sciences, Beijing, 100049, China.

\*Corresponding author: [wxftsjc@home.ipe.ac.cn](mailto:wxftsjc@home.ipe.ac.cn)

## 1. Preparation of monodispersive PS particles

The monodisperse PS colloidal particles were synthesized according to the reported procedure<sup>[1]</sup>: 10 g of styrene was added to a mixture composed of 95 g of absolute ethanol and 5g of distilled water. 2 g of PVP was then dissolved in the above system. It was stirred by a magnetic bar and purged with bubbling nitrogen for 30 min. After that the reaction system was heated to 70°C using an oil bath. When that

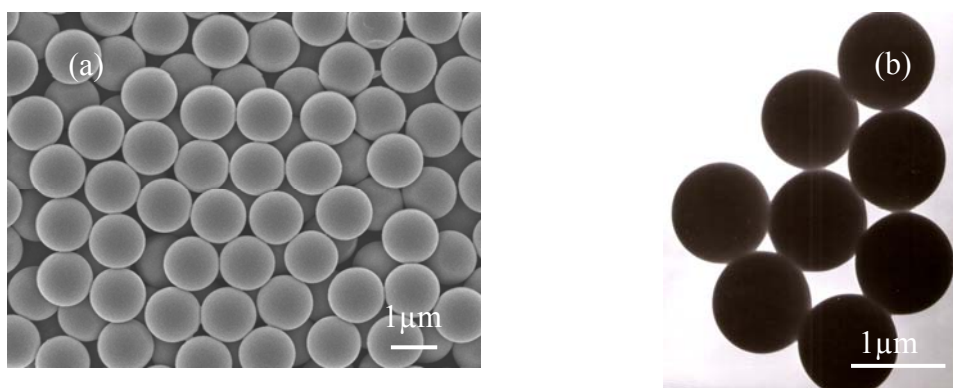

**Figure 1S.** SEM (a) and TEOS(b) images of as-obtained monodispersive polystyrene (PS) colloidal particles

temperature was reached, 0.1 g of AIBN was added to the system to initiate the polymerization of styrene. The whole reaction lasted for 12 h under bubbling nitrogen. PS particles were obtained by

centrifuge at 6000 rpm, washed twice with absolute ethanol and then dried in a vacuum oven at 50°C for subsequent use. The as-obtained products(average size  $\langle d \rangle = 1\mu\text{m}$ ; dispersity  $\delta=10\%$ ) are shown in Figure1S.

## 2. The small-angle XRD pattern of the bionic hollow silica spheres

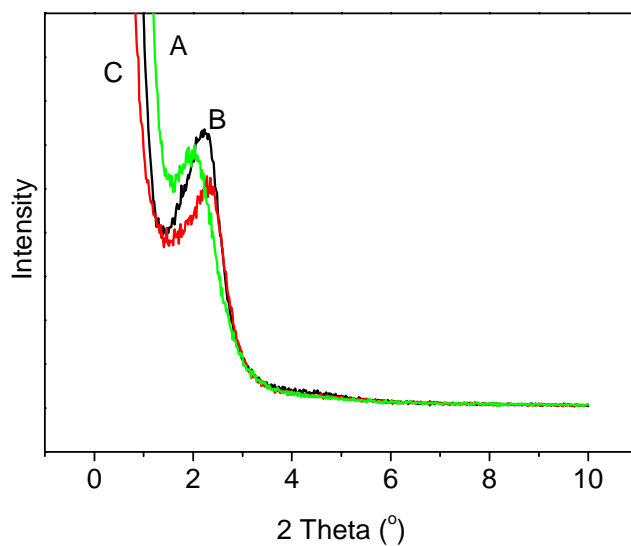

**Figure 2S.** Small-angle XRD patterns of the sample as shown in Figure 1A-C

## 3. Porosity of mesoporous hollow silica spheres obtained at extreme pH value

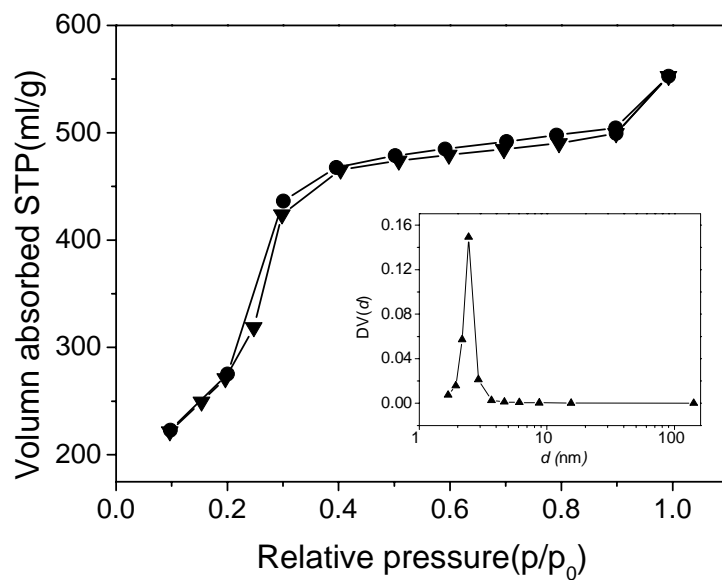

**Figure 3S.**  $N_2$  adsorption-desorption isotherm and pore distribution curves of mesoporous hollow spheres obtained at pH value of 13

## Reference

- [1] Lami,E.B.; Lang, J. J. Colloid Interface Sci 1998, 197, 293-308.
